# Supplementary material for: Paratope Duality and Gullying are Among the Atypical Recognition Mechanisms Used by a Trio of Nanobodies to Differentiate Ebolavirus Nucleoproteins
Source: PubMed Central journal article supplement (PMC6990103; doi:10.1016/j.jmb.2019.10.005), 2019-10-15
Supplement: NIHMS1544227-supplement-1.pdf [file NIHMS1544227-supplement-1.pdf]

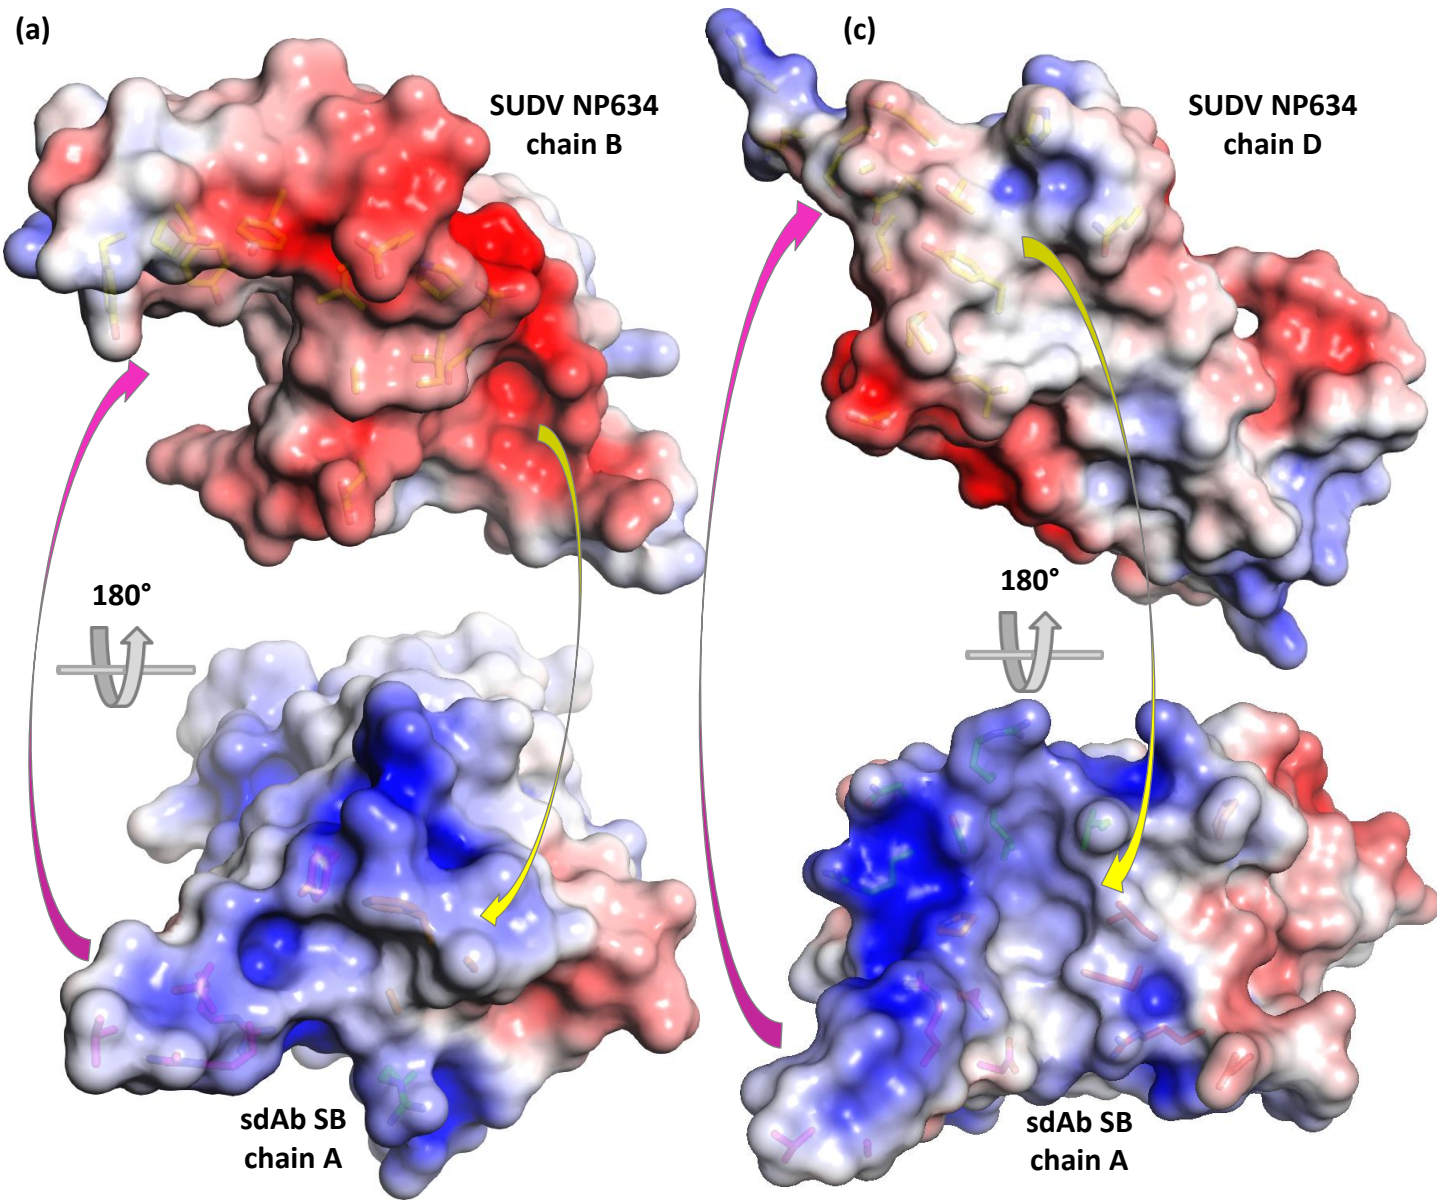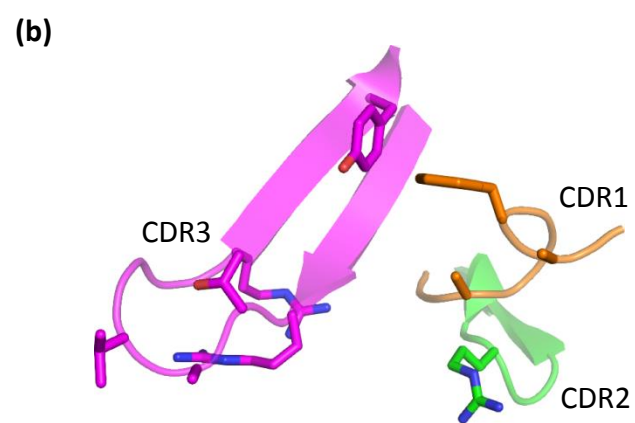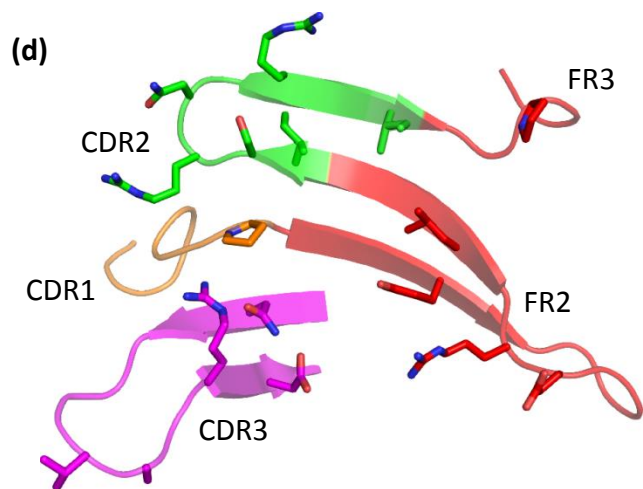

**Supplementary Information Fig. 1.** Engagement of SUDV NP634 by sdAb SB. **(a)** Top is the antibody's eye view of the epitope on chain B of NP634 while below is the NP eye's view of the sdAb paratope. Arrows indicate some of the major complementarities that are visible. **(b)** SdAb SB bound CDRs and FR2, aligned with the NP634 eye's view. **(c)** Top is the antibody's eye view of the epitope on chain D of NP634 while below is the NP eye's view of the sdAb paratope. Arrows indicate some of the major complementarities that are visible. **(d)** SdAb SB bound CDRs, FR2 and FR3, aligned with the NP634 eye's view as cartoons.
